# Supplementary material
Source: Research Square preprint supplement (doi:10.21203/rs.3.rs-9172367/v1)
Supplement: Supplementary file 1 [file ed70cf898040cf883bf51064.docx]

**MODIFIED MASK-ASSOCIATED DRY EYE DISEASE QUESTIONNARE**

1. **PERSONAL DATA**
2. Age (in years):
3. Gender: Male ( ) Female ( )
4. Address:
5. Ethnicity:
6. Religion: Christianity ( ) Islam( ) Others ( )
7. Educational status: Primary ( ) Secondary ( ) Tertiary ( )
8. Work Environment: Open ( ) Restricted ( )
9. **PAST OCULAR HISTORY**
10. Do you have poor vision? Yes ( ) No ( ). If yes, describe................................................
11. Have you used eye medications in the past 3 months? Yes ( ) No ( ), if yes specify; .......................................................................................................................................
12. Do you have a history of dry eye disease? Yes ( ) No( )
13. Have you used any medication for dry eye disease in the past 3 months? Yes ( ) No ( )
14. Have you done eye surgeries or laser eye procedures in the past? Yes ( ) No ( ) If yes specify................................................................................................................
15. Have you used eyeglasses in the past? Yes ( ) No ( )
16. **MEDICAL HISTORY**
17. Do you have any medical conditions? Yes ( ) No ( ) If yes, specify…………………………
18. Are you currently on any long-term medications? Yes ( ) No ( )

If yes, specify medication and duration of use…………………………

1. **RISK FACTORS FOR MASK -ASSOCIATED DRY EYE DISEASE**

| S/N | FACTOR | RARELY (0-4HRS) | SOMETIMES(4-6HRS) | MOSTTIMES(6-8HRS) | OFTEN (>8HRS) |
| --- | --- | --- | --- | --- | --- |
| 1 | How many hours a day do you wear facemasks? |  |  |  |  |
| 2 | How often do you fit the facemask to cover the mouth and nose? |  |  |  |  |
| 3 | How many hours a day do you read? |  |  |  |  |
| 4 | How many hours a day do you use a Visual Display Terminal (computer, laptop, smartphone, etc) |  |  |  |  |
| 5 | How many hours a day do you spend outdoors? |  |  |  |  |

1. **DRY EYE SYMPTOMS**

Kindly tick the box that corresponds to your answer.

|  | PRE-FACE MASK WEAR | | |  | POST-FACE MASK WEAR WITHOUT TAPING | | | POST-FACE MASK WEAR WITH TAPING | | |
| --- | --- | --- | --- | --- | --- | --- | --- | --- | --- | --- |
| H**ow many times a day do you experience any of the following symptoms in the last 1 week?** | Never  (0 time per day) | Some  times  (1-4 times per day) | Often (>4 times per day) | **Did you experience any of the following symptoms while wearing the facemask?** | Never  (0 time per day) | Some  times  (1-4 times per day) | Often (>4 times per day) | Never  (0 time per day) | Some  times  (1-4 times per day) | Often (>4 times per day) |
| 1. Tearing? |  |  |  | 1.Tearing? |  |  |  |  |  |  |
| 2. Eyes that feel gritty? |  |  |  | 2.Eyes that feel gritty? |  |  |  |  |  |  |
| 3. Eye pain? |  |  |  | 3.Eye pain? |  |  |  |  |  |  |
| 4. Feeling of dryness? |  |  |  | 4.Feeling of dryness? |  |  |  |  |  |  |
| 5. Foreign body sensation? |  |  |  | 5.Foreign body sensation? |  |  |  |  |  |  |
| 6. Burning sensation? |  |  |  | 6.Burning sensation? |  |  |  |  |  |  |
| 7. Redness? |  |  |  | 7.Redness? |  |  |  |  |  |  |
| 8. Itching? |  |  |  | 8. Itching? |  |  |  |  |  |  |
| **TOTAL SCORE**  **(0-16)** |  |  |  |  |  |  |  |  |  |  |
